# Supplementary material for: HS-1371, a novel kinase inhibitor of RIP3-mediated necroptosis
Source: PubMed Central journal article supplement (PMC6148246; doi:10.1038/s12276-018-0152-8), 2018-09-20
Supplement: 12276_2018_152_MOESM1_ESM.pdf [file 12276_2018_152_MOESM1_ESM.pdf]

# Supplementary Figure 1.

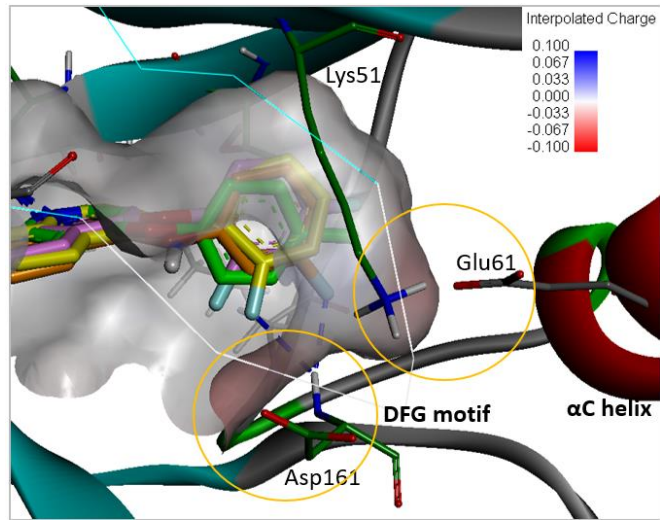

# Supplementary Figure 2.

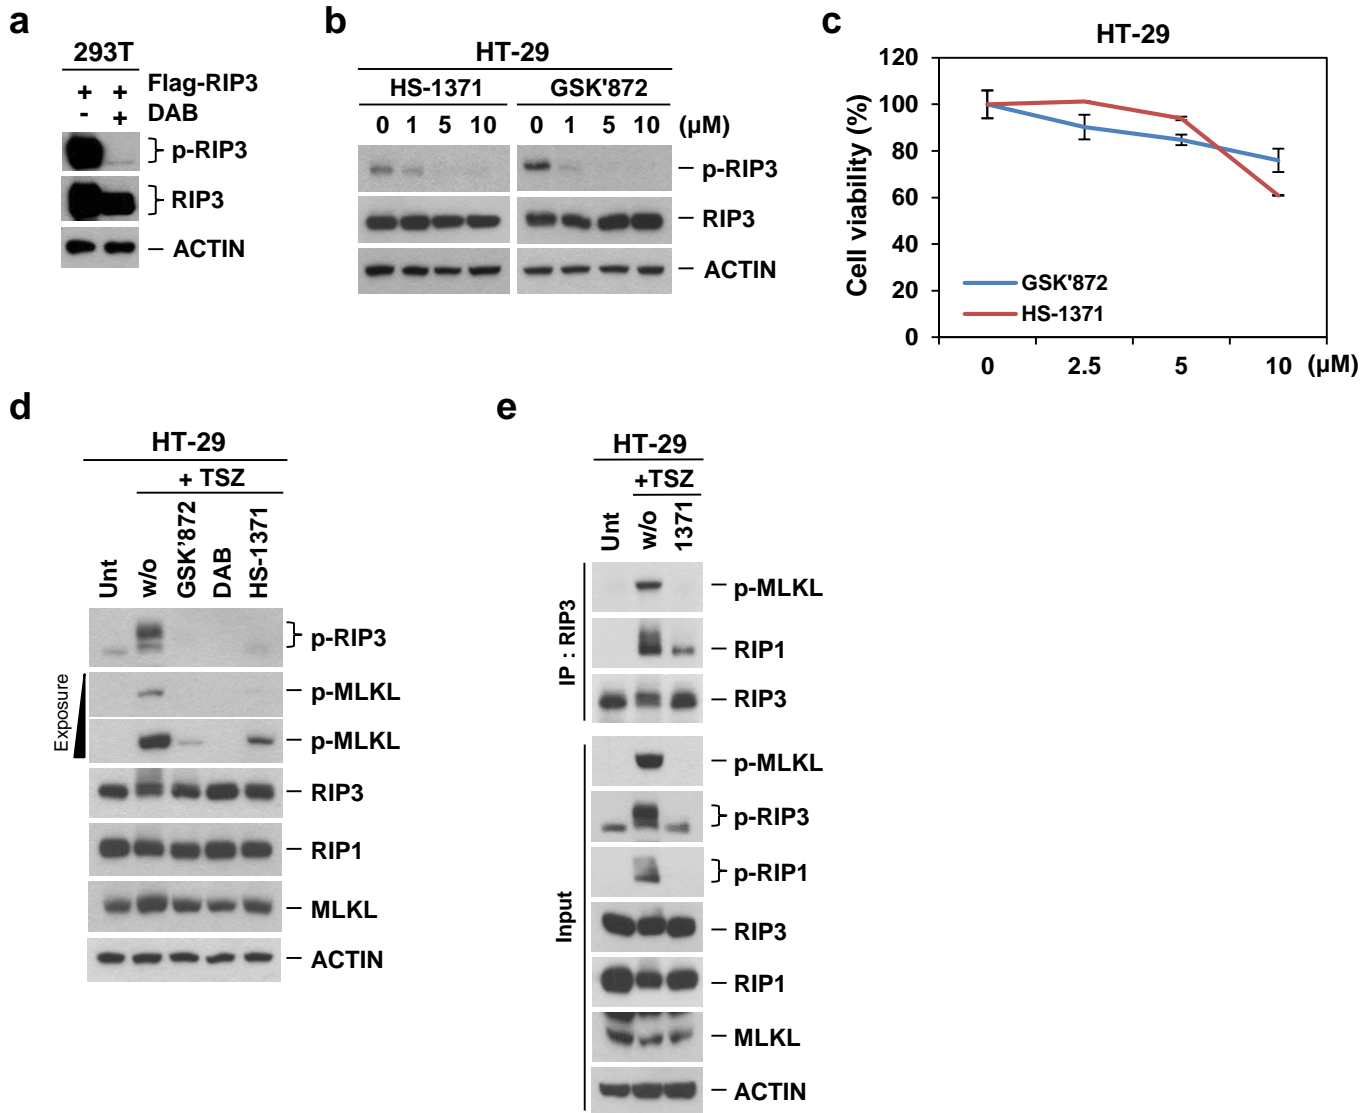

# Supplementary Figure 3.

**a**

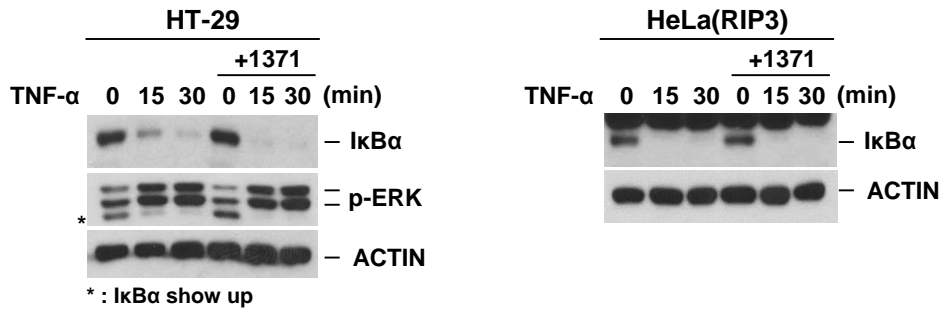

**b**

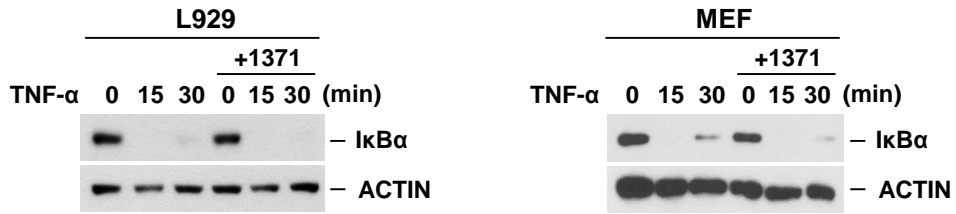

# Supplementary Figure 4.

**a**

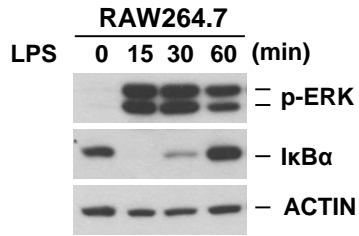

**b**

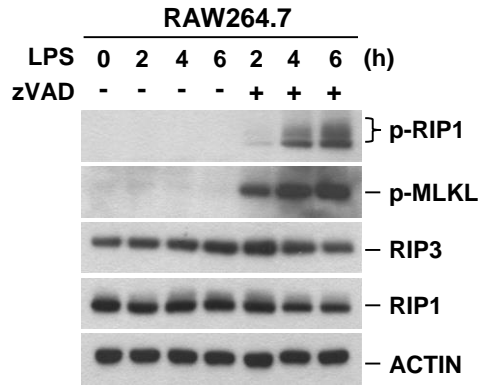

**c**

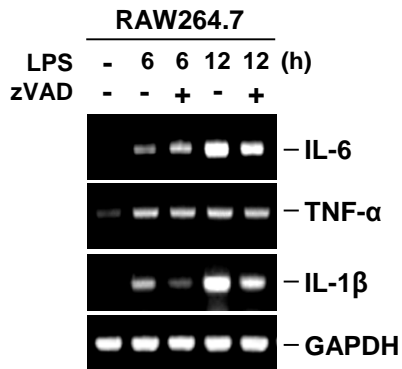

**d**

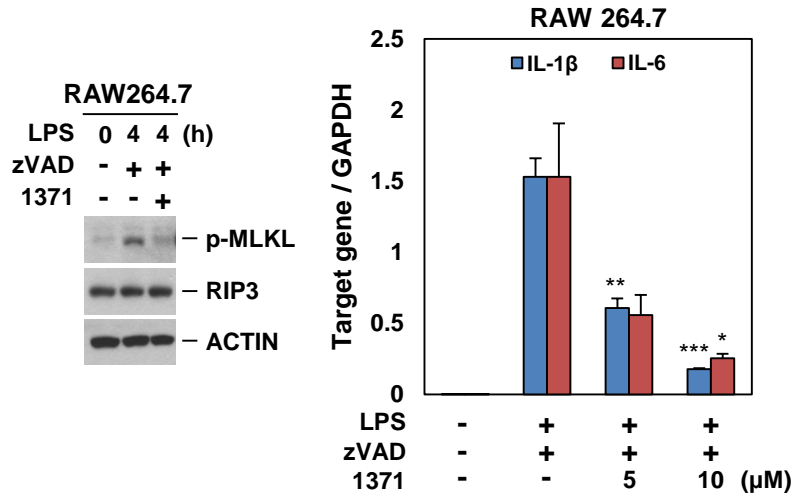

**e**

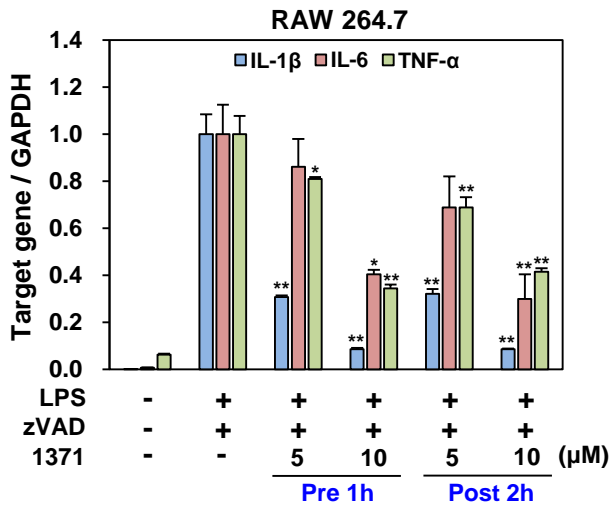

## **SUPPLEMENTARY FIGURE LEGENDS**

### ***Supplementary Figure 1. Identification of HS-1371 as a novel RIP3 kinase inhibitor.***

Detailed interaction patterns in the region surrounded by DFG motif and  $\alpha$ C helix of RIP3. Hydrogen bonds are indicated with dotted lines.

### ***Supplementary Figure 2. The effect of HS-1371 was compared with GSK'872.***

(a) Overexpression of RIP3 could induce S227 phosphorylation without stimuli. HEK293T cells were transiently transfected with Flag-hRIP3, and cells were treated with or without DAB for incubation periods. After cells were harvested, cell lysates were analyzed by immunoblotting.

(b) Kinase inhibitory effect of HS-1371 was compared with GSK'872 which is known RIP3 kinase inhibitor. HT-29 cells were treated with HS-1371 or GSK'872 indicated concentrations for 9 h, and cell lysates were analyzed by immunoblotting.

(c) Cytotoxicity of HS-1371 was compared with GSK'872. HT-29 cells were treated with 2 kinase inhibitors for 24 h and cell viability was analyzed by MTT assay.

(d) Inhibition of MLKL phosphorylation by HS-1371 was compared with other two RIP3 kinases inhibitors, DAB (5  $\mu$ M) and GSK'872 (5  $\mu$ M). HT-29 cells were pretreated with 3 kinase inhibitors for 2 h and then treated with TSZ for 6 h. Cell lysates were analyzed by immunoblotting.

(e) HS-1371 inhibits necrosome complex formation. HT-29 cells were pretreated with HS-1371 (5  $\mu$ M) for 2 h and then treated with TSZ for 4 h. Cell lysates were immunoprecipitated with anti-RIP3 antibody.

### ***Supplementary Figure 3. HS-1371 had no effect on TNF-induced NF- $\kappa$ B signaling.***

(a & b) HS-1371 had no effect on TNF-induced NF- $\kappa$ B signaling. HT-29, RIP3 expressing

HeLa, L929, and MEF cells were pretreated with HS-1371 (5  $\mu$ M) for 2 h, and treated with TNF (30 ng/mL) for indicated time points. Cell lysates were analyzed by immunoblotting.

***Supplementary Figure 4. Necroptosis-mediated inflammatory response was decreased by HS-1371.***

(a) RAW264.7 cells were treated with LPS (1  $\mu$ g/mL) for indicated time points and cell lysates were analyzed by immunoblotting.

(b) RAW264.7 cells were pretreated with zVAD (20  $\mu$ M) for 1 h and then treated with LPS (1  $\mu$ g/mL) for indicated time points. Cell lysates were analyzed by immunoblotting.

(c) IL-6, TNF- $\alpha$ , and IL-1 $\beta$  expression levels were determined by RT-PCR analysis. RAW264.7 cells were treated with LPS alone or LPS plus zVAD. GAPDH is shown as an internal control.

(d) RAW264.7 cells were pretreated with zVAD (20  $\mu$ M) and HS-1371 (5  $\mu$ M) for 1 h and then treated with LPS (1  $\mu$ g/mL) for 4 h. Cell lysates were analyzed by immunoblotting (left panel). IL-1 $\beta$  and IL-6 expression levels were determined by real-time PCR analysis. RAW264.7 cells were pretreated with zVAD and HS-1371 indicated concentrations for 1 h and then treated with LPS for 12 h (right panel).

(e) IL-1 $\beta$ , IL-6 and TNF- $\alpha$  expression levels were determined by real-time PCR analysis. RAW264.7 cells were treated with HS-1371 (pretreatment for 1 h or post-treatment for 2 h). zVAD were pretreated 1 h before LPS treatment (12 h).
